# Supplementary material
Source: MDPI journal article supplement (https://www.mdpi.com/2227-9717/12/1/149)
Supplement: s1 [file s1]

# SUPPLEMENTARY MATERIALS

## Surface Chemistry of Cherry Stone-Derived Activated Carbon prepared by H<sub>3</sub>PO<sub>4</sub> Activation

J.M. González-Domínguez <sup>1,\*</sup>, M.C. Fernández-González<sup>2</sup>, M. Alexandre-Franco<sup>2</sup>, V. Gómez-Serrano <sup>2,\*</sup>

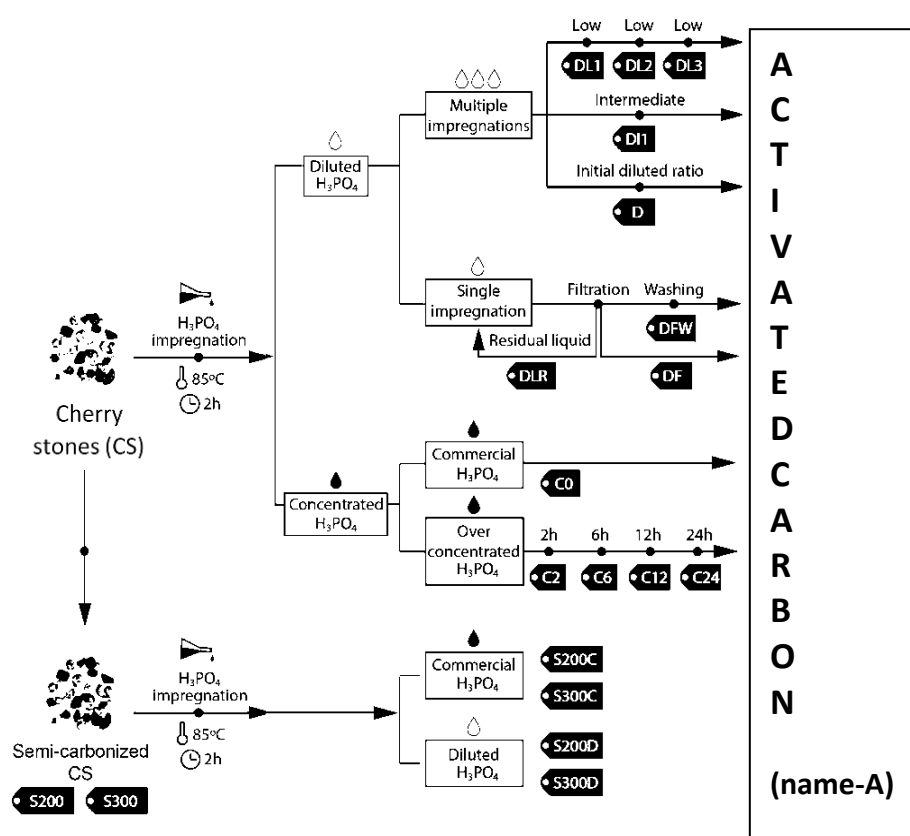

**Figure S1.** Graphical scheme depicting the samples preparation sequence (regarding the different impregnation methodologies with H<sub>3</sub>PO<sub>4</sub>). Cherry stones are impregnated either with diluted (D) H<sub>3</sub>PO<sub>4</sub>, of 16 g/100 mL concentration, in single or multiple (DL, DI) impregnation steps adding up a total concentration equal to D, by filtration (DF) and/or washig (DFW), and using the residual liquid as the impregnation solution (DLR); or commercial concentrated (C) H<sub>3</sub>PO<sub>4</sub> of 144 g/ 100 mL concentration and their overconcentrated derived solutions by mildly heating it at different time in hours (C2, C4, etc.). The semi-carbonized cherry stones were also impregnated with either D or C H<sub>3</sub>PO<sub>4</sub> solutions. All impregnated samples ended up in activated carbon samples after heat treatment at 500°C for 2h under a N<sub>2</sub> atmosphere. Thus, the eventual sample name would end in –A.
